# Supplementary material for: Diffusivity and hydrophobic hydration of hydrocarbons in supercritical CO2 and aqueous brine
Source: Royal Society of Chemistry journal article supplement (doi:10.1039/d0ra06499h), 2020-01-01
Supplement: d0ra06499h1.pdf [file d0ra06499h1.pdf]

**Supporting information:**

**Diffusivity and Hydrophobic Hydration of  
Hydrocarbons in Supercritical CO<sub>2</sub> and Aqueous  
Brine**

Hyeonseok Lee<sup>2</sup>, Mehdi Ostadhassan<sup>1,3\*</sup>, Zheng Sun<sup>4</sup>, Hui Pu<sup>2</sup>, Bo Liu<sup>1</sup>, Rajender S. Varma<sup>5</sup>, Ho Won Jang<sup>6\*</sup>, Mohammadreza Shokouhimher<sup>2,6\*</sup>

<sup>1</sup>*Department of Petroleum Engineering, University of North Dakota, Grand Forks, ND 58202, United States*

<sup>2</sup>*Key Laboratory of Continental Shale Hydrocarbon Accumulation and Efficient Development, Northeast Petroleum University, Daqing 163318, China*

\*Corresponding authors' e-mail addresses: mehdi.ostadhassan@nepu.edu.cn

## Potential Energy Profile

Before evaluating the results of the simulations, it is necessary to demonstrate that the system reaches the equilibrium, with a proper distribution of kinetic and potential energy. In Fig. S1 we present plots of the total energy of the systems for different brine concentration for Benzene and Pentane. We found that the all systems reach equilibrium around first 50 ps for the NVP simulations.

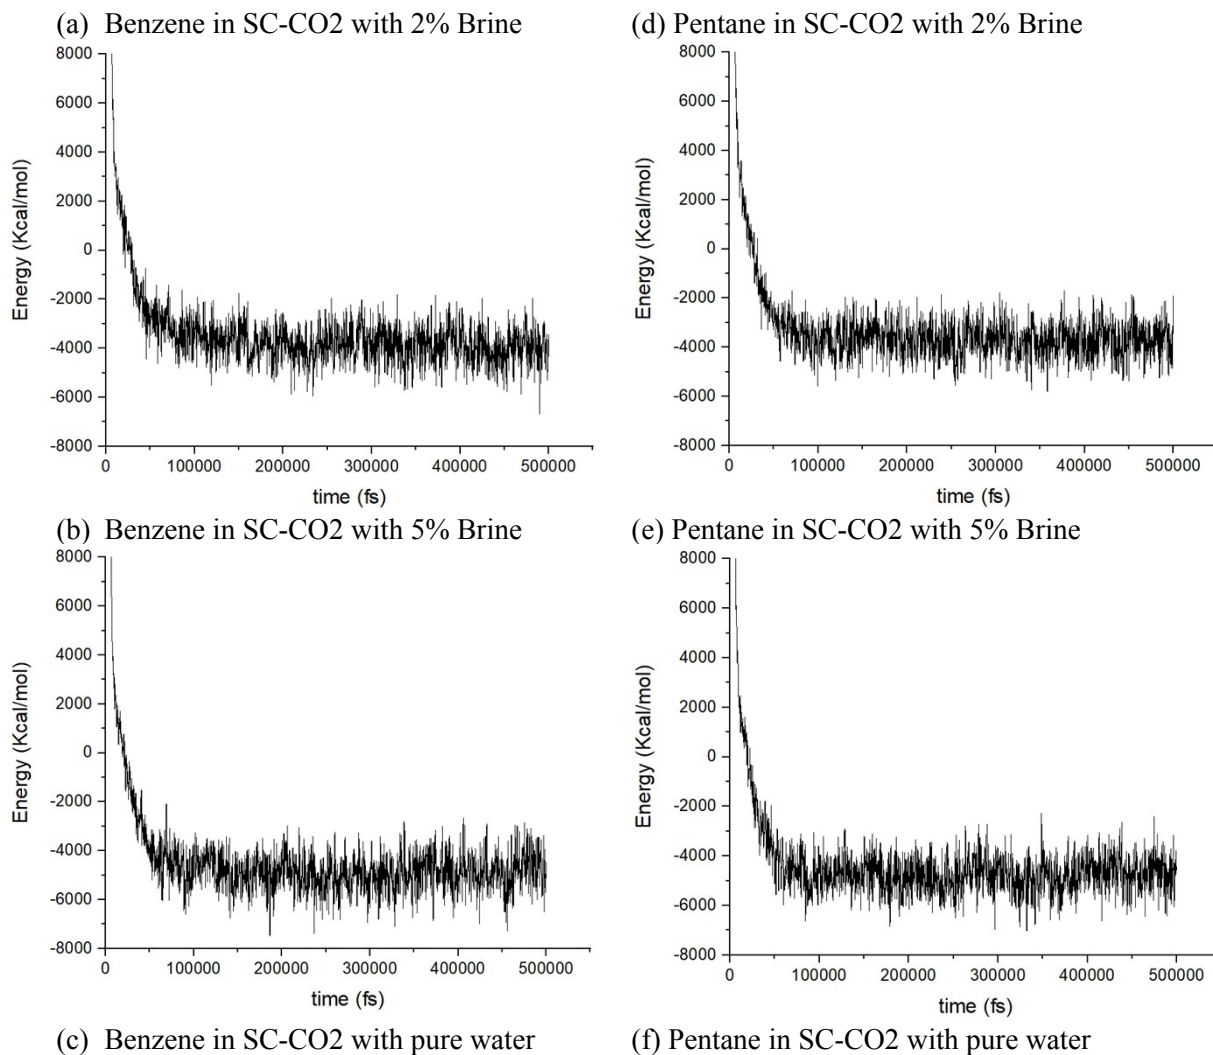

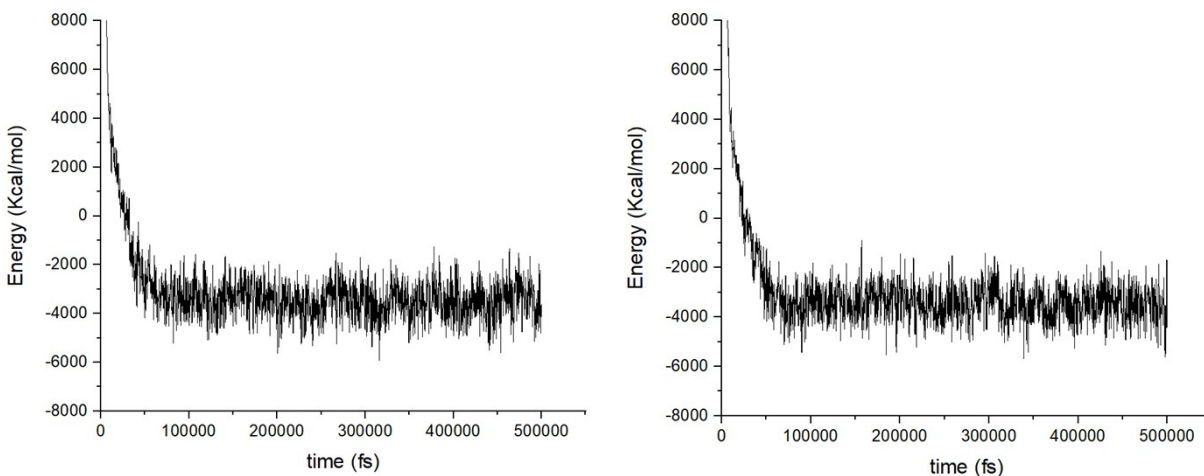

Fig. S1. Averaged energy (in kcal/mol) of simulation systems; (a) infinitely diluted benzene in CO<sub>2</sub> and 2% Brine (4 wt.%), (b) infinitely diluted benzene in CO<sub>2</sub> and 5% Brine (4 wt.%), (c) infinitely diluted benzene in CO<sub>2</sub> and pure water (4 wt.%), (d) infinitely diluted pentane in CO<sub>2</sub> and 2% Brine (4 wt.%), (e) infinitely diluted pentane in CO<sub>2</sub> and 5% Brine (4 wt.%), (f) infinitely diluted pentane in CO<sub>2</sub> and pure water (4 wt.%),

## Intermolecular Potentials

Table S1. Parameters related to the solute (hydrocarbon: benzene and pentane)<sup>1-3</sup>.

| Molecule | Atom             | Charge | $\sigma$<br>(Å) | $\epsilon$<br>(kcal mol <sup>-1</sup> ) | $r$<br>(Å)                            | $\theta$<br>(deg)                                                                | Cn(C-C-C-C)<br>(kcal mol <sup>-1</sup> ) | Cn(H-C-C-X)<br>(kcal mol <sup>-1</sup> ) |
|----------|------------------|--------|-----------------|-----------------------------------------|---------------------------------------|----------------------------------------------------------------------------------|------------------------------------------|------------------------------------------|
| Pentane  | C <sub>CH2</sub> | -0.148 | 3.5             | 0.066                                   | $r_{(C-C)}=1.529$<br>$r_{(C-H)}=1.09$ | $\theta_{(C-C-C)}=112.7$<br>$\theta_{(C-C-H)}=110.7$<br>$\theta_{(H-C-H)}=107.8$ | C <sub>0</sub> =0.123993                 | C <sub>0</sub> =0.15                     |
|          | H <sub>CH2</sub> | 0.074  | 2.5             | 0.0263                                  |                                       |                                                                                  | C <sub>1</sub> =-0.05501                 | C <sub>1</sub> =0.45                     |
|          | C <sub>CH3</sub> | -0.222 | 3.5             | 0.066                                   |                                       |                                                                                  | C <sub>2</sub> =0.214342                 | C <sub>2</sub> =0                        |
|          | H <sub>CH3</sub> | 0.074  | 2.5             | 0.03                                    |                                       |                                                                                  | C <sub>3</sub> =-0.35643                 | C <sub>3</sub> =-0.6                     |
| Benzene  | C                | -0.115 | 3.55            | 0.07                                    | $r_{(C-C)}=1.40$                      | $\theta_{(C-C-C)}=120$                                                           |                                          |                                          |
|          | H                | 0.115  | 2.42            | 0.03                                    | $r_{(C-H)}=1.08$                      | $\theta_{(C-C-H)}=120$                                                           |                                          |                                          |

Table S2. Parameters related to the solution (CO<sub>2</sub>, water and salt)<sup>4-6</sup>.

| Molecules             | Atoms/Ions       | $q$ (e) | $\sigma$ (Å) | $\epsilon$ (Kcal/mol) | $r_{O-H}$ | $\theta_{H-O-H}$ |
|-----------------------|------------------|---------|--------------|-----------------------|-----------|------------------|
| <i>H<sub>2</sub>O</i> | O                | -1.1128 | 3.1589       | 0.1852                | 0.9572    | 104.52°          |
|                       | H                | 0.5564  | 0.0          | 0.0                   |           |                  |
| <i>CO<sub>2</sub></i> | C                | 0.6512  | 2.757        | 0.0558                | 1.149     | 180°             |
|                       | O                | -0.3256 | 3.033        | 0.1599                |           |                  |
| Molecules             | Atoms/Ions       | $q$ (e) | $\sigma$ (Å) | $\epsilon$ (Kcal/mol) |           |                  |
| Salt                  | Na <sup>1+</sup> | 1.00    | 2.35         | 0.13                  |           |                  |
|                       | Cl <sup>1-</sup> | -1.00   | 4.40         | 0.10                  |           |                  |

## References

- (1) L. Jorgensen, W.; S. Maxwell, D.; Tirado-Rives, J. Development and Testing of the OPLS All-Atom Force Field on Conformational Energetics and Properties of Organic Liquids. *J. Am. Chem. Soc.* 1996, 118 (45), 11225–11236. <https://doi.org/10.1021/ja9621760>.
- (2) Kaminski, G. A.; Friesner, R. A.; Tirado-Rives, J.; Jorgensen, W. L. Evaluation and Reparametrization of the OPLS-AA Force Field for Proteins via Comparison with Accurate Quantum Chemical Calculations on Peptides. *J. Phys. Chem. B* 2001, 105 (28), 6474–6487. <https://doi.org/10.1021/jp003919d>.
- (3) Siu, S. W. I.; Pluhackova, K.; Böckmann, R. A. Optimization of the OPLS-AA Force Field for Long Hydrocarbons. *J. Chem. Theory Comput.* 2012, 8 (4), 1459–1470. <https://doi.org/10.1021/ct200908r>.
- (4) Abascal, J. L. F.; Vega, C. A General Purpose Model for the Condensed Phases of Water: TIP4P/2005. *J. Chem. Phys.* 2005, 123 (23), 234505. <https://doi.org/10.1063/1.2121687>.
- (5) Harris, J. G.; Yung, K. H. Carbon Dioxide's Liquid-Vapor Coexistence Curve And Critical Properties as Predicted by a Simple Molecular Model. *J. Phys. Chem.* 1995, 99 (31), 12021–12024. <https://doi.org/10.1021/j100031a034>.
- (6) Smith, D. E.; Dang, L. X. Computer Simulations of NaCl Association in Polarizable Water. *J. Chem. Phys.* 1994, 100 (5), 3757–3766. <https://doi.org/10.1063/1.466363>.
